# Supplementary material for: Rates, costs, return to work and reoperation following spinal surgery in a workers’ compensation cohort in New South Wales, 2010–2018: a cohort study using administrative data
Source: PubMed Central journal article supplement (PMC8436510; doi:10.1186/s12913-021-06900-8), 2021-09-11

Supplement to: Rates, costs, return to work and reoperation following spine surgery in a workers' compensation cohort in New South Wales, 2010-2018: a cohort study using administrative data

Supplemental Table S1. AMA and SIRA variables used to identify exclusion criteria (fracture, dislocation and traumatic brain injury).

| Source                                         | Variable                  | Value(s)                                                                                        | Description                                                                                                                                                                                                 |
|------------------------------------------------|---------------------------|-------------------------------------------------------------------------------------------------|-------------------------------------------------------------------------------------------------------------------------------------------------------------------------------------------------------------|
| SIRA                                           | Nature of injury          | 020<br>(pre-July 2011)                                                                          | Fracture of vertebral column with or without mention of spinal cord lesion                                                                                                                                  |
| SIRA                                           | Nature of injury          | 112<br>(post-July 2011)                                                                         | Fracture of vertebral column without mention of spinal cord lesion                                                                                                                                          |
| SIRA                                           | Nature of injury          | 310<br>(post-July 2011)                                                                         | Quadriplegia involving spinal cord injury                                                                                                                                                                   |
| AMA                                            | Item number               | MQ305-375                                                                                       | Treatment of fracture, dislocation or fracture-dislocation (SPINE)                                                                                                                                          |
| SIRA<br><br><b>Both conditions must be met</b> | Nature of injury          | 030<br>(pre-July 2011)                                                                          | Dislocation                                                                                                                                                                                                 |
|                                                | Bodily location of injury | 310: Upper back<br>311: Lower back<br>318: Back - other and multiple<br>319: Back - unspecified |                                                                                                                                                                                                             |
| SIRA<br><br><b>Both conditions must be met</b> | Nature of injury          | 201<br>(post-July 2011)                                                                         | Dislocation                                                                                                                                                                                                 |
|                                                | Bodily location of injury | 319: Back - unspecified                                                                         |                                                                                                                                                                                                             |
| SIRA                                           | Payment classification    | PBI001-PBI005                                                                                   | Brain injury rehabilitation<br>These codes apply to patients admitted to an inpatient Brain Injury Rehabilitation Program (BIRP) unit, a Transitional Living Unit or to Compensable non-inpatient services. |

Abbreviations: SIRA=State Insurance Regulatory Agency of NSW; AMA=Australian Medical Association List of Medical Services and Fees

Supplement to: Rates, costs, return to work and reoperation following spine surgery in a workers' compensation cohort in New South Wales, 2010-2018: a cohort study using administrative data

Supplemental Table S2. AMA item numbers used to identify surgery type (fusion or decompression).

| <b>Fusion</b>        |                                            |       |                                         |
|----------------------|--------------------------------------------|-------|-----------------------------------------|
| LT135                | Fusion posterior                           | MT170 | Bone graft, poster-lateral fusion, 1-2  |
| LT145                | Fusion posterior                           | MT180 | Bone graft, poster-lateral fusion, >2 1 |
| LT155                | Fusion posterior                           | MT190 | Fusion posterior                        |
| LT215                | Fusion Cervical                            | MT200 | Fusion multi level                      |
| MT030                | Fusion Scoliosis or kyphosis               | MT210 | Fusion Anterior 1 level                 |
| MT050                | Fusion Scoliosis                           | MT220 | Fusion Anterior 1 level - principal     |
| MT055                | Fusion Scoliosis or kyphosis               | MT230 | Fusion Anterior 1 level - assisting     |
| MT080                | Fusion Scoliosis                           | MT240 | Anterior multi level                    |
| MT090                | Fusion Scoliosis, > 4 levels               | MT250 | Anterior multi level - principal        |
| MT100                | Fusion Scoliosis                           | MT260 | Anterior multi level - assisting        |
| MT110                | Fusion Scoliosis                           | MT270 | Fusion                                  |
| MT120                | Fusion Scoliosis, congenital               | MT280 | Fusion - not scoliosis                  |
| MT140                | Vertebral body, excision, incl. bone graft | MT290 | Fusion - not scoliosis                  |
| MT145                | Vertebral body, disease of, excision an    | MT300 | Fusion multi level - not scoliosis      |
| MT150                | Bone graft, posterior, 1-2 levels          | MT310 | Fusion multi level - not scoliosis      |
| MT160                | Bone graft, posterior, >2 levels           |       |                                         |
| <b>Decompression</b> |                                            |       |                                         |
| LT045                | Single Level                               | LT195 | Cervical                                |
| LT055                | Single Level                               | LT205 | Cervical                                |
| LT065                | Single Level                               | LT255 | Thoracic                                |
| LT075                | Decompression multi level                  | LT265 | Thoracic                                |
| LT165                | Single Level (Spinal rhizolysis)           | LT275 | Thoraco lumbar or high lumbar           |
| LT175                | Cervical                                   | MT130 | Lumbar, 1+ levels                       |
| LT185                | Cervical                                   | MT230 | Fusion Anterior 1 level - assisting     |

Abbreviations: AMA=Australian Medical Association List of Medical Services and Fees

Supplement to: Rates, costs, return to work and reoperation following spine surgery in a workers' compensation cohort in New South Wales, 2010-2018: a cohort study using administrative data

Supplemental Table S3. AMA and SIRA variables used to identify spine region (cervical, lumbar).

| <b>Cervical</b> |                           |       |                                                           |
|-----------------|---------------------------|-------|-----------------------------------------------------------|
| Source          | Variable                  | Value | Description                                               |
| AMA             | Item number               | LT215 | Cervical decompression of spinal cord                     |
|                 |                           | MT342 | Cervical artificial intervertebral total disc replacement |
|                 |                           | LT175 | Cervical decompression of spinal cord                     |
|                 |                           | LT185 | Cervical decompression of spinal cord                     |
|                 |                           | LT195 | Cervical partial or total discectomy (anterior)           |
|                 |                           | LT205 | Cervical decompression of spinal cord                     |
| SIRA            | bodily location of injury | 210   | Neck bones, muscles and tendons                           |
|                 |                           | 218   | Neck - other and multiple                                 |
|                 |                           | 219   | Neck - unspecified                                        |
|                 |                           | 620   | Head and neck                                             |
|                 |                           | 660   | Neck and shoulder                                         |
| <b>Lumbar</b>   |                           |       |                                                           |
| AMA             | Item number               | MT320 | Lumbar artificial intervertebral total disc replacement   |
|                 |                           | MT330 | Lumbar artificial intervertebral total disc replacement   |
|                 |                           | MT340 | Lumbar artificial intervertebral total disc replacement   |
|                 |                           | MT130 | Percutaneous lumbar partial or total discectomy           |
|                 |                           | LT275 | Thoraco-lumbar or high lumbar anterior decompression      |
| SIRA            | bodily location of injury | 311   | Lower back                                                |

Abbreviations: SIRA=State Insurance Regulatory Agency of NSW; AMA=Australian Medical Association List of Medical Services and Fees

Supplement to: Rates, costs, return to work and reoperation following spine surgery in a workers' compensation cohort in New South Wales, 2010-2018: a cohort study using administrative data

Supplemental Table S4. Return-to-work status at 24 months post-surgery, by surgery type

|                             | <b>Fusion<br/>N=2,762</b> | <b>Decompression<br/>N=4,279</b> |
|-----------------------------|---------------------------|----------------------------------|
| Working at full capacity    | 524 (18.9)                | 1674 (39.1)                      |
| Working at reduced capacity | 354 (12.8)                | 547 (12.8)                       |
| Not working                 | 1781 (64.4)               | 1943 (45.4)                      |
| Retired                     | 90 (3.2)                  | 108 (2.5)                        |
| Deceased                    | 13 (0.5)                  | 7 (0.2)                          |

\* Restricted to surgeries from 2010-2016 to allow 24 months for outcome ascertainment.

Supplement to: Rates, costs, return to work and reoperation following spine surgery in a workers' compensation cohort in New South Wales, 2010-2018: a cohort study using administrative data

Supplemental Figure S1. Reoperation at 24 months by surgery type and spine region.

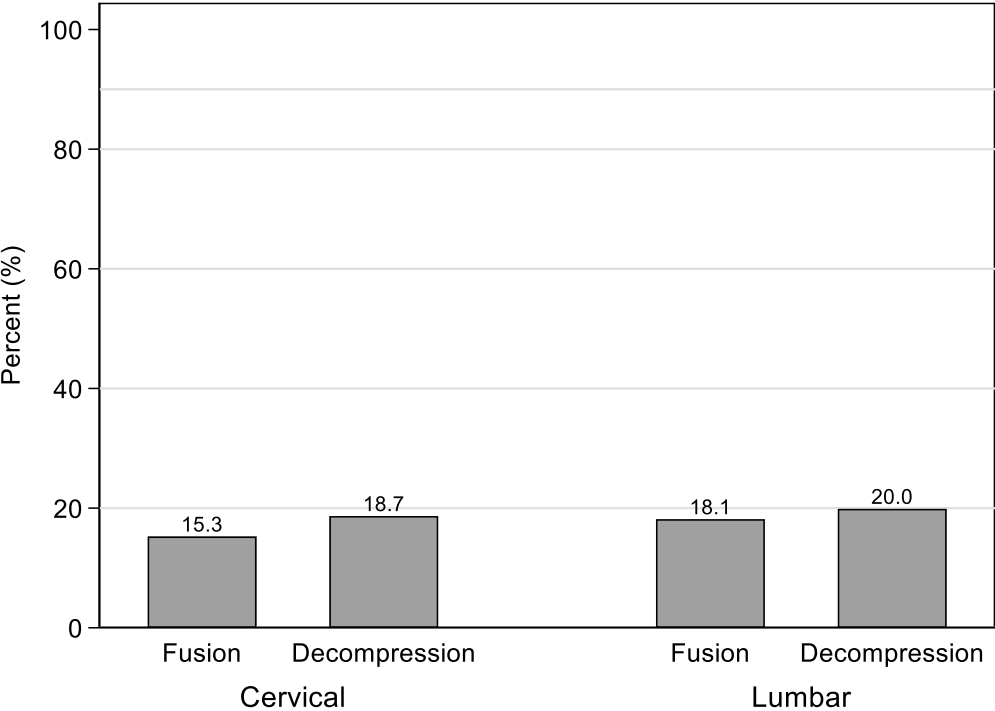

Supplement: 12913_2021_6900_MOESM1_ESM.pdf [file 12913_2021_6900_MOESM1_ESM.pdf]
